# Supplementary material for: Unveiling the organic contribution to the initial particle growth in 3–10 nm size range
Source: Copernicus journal article supplement (doi:10.5194/egusphere-2025-4421), 2025-10-06
Supplement: Supplementary file 1 [file egusphere-2025-4421-supplement.pdf]

# **Unveiling the organic contribution to the initial particle growth in 3-10 nm size range**

5 Kewei Zhang<sup>1</sup>, Zhengning Xu<sup>1,2</sup>, Fei Zhang<sup>1,2</sup>, Zhibin Wang<sup>1,2,\*</sup>

<sup>1</sup>State Key Laboratory of Soil Pollution Control and Safety, Zhejiang Provincial Key Laboratory of Organic Pollution Process and Control, College of Environmental and Resource Sciences, Zhejiang University, Hangzhou 310058, China

<sup>2</sup>ZJU-Hangzhou Global Scientific and Technological Innovation Center, Zhejiang University, Hangzhou 311200, China

10 *Correspondence to:* Zhibin Wang ([wangzhibin@zju.edu.cn](mailto:wangzhibin@zju.edu.cn))

**Table S1. Summary of experimental conditions. Exp. A-F is a series of groups conducted under specific RH (20%, 40%, 60% and 80%). Exp. A represents the pure inorganic groups in the presence of SO<sub>2</sub> and Exp. B represents the pure organic groups in the presence of  $\alpha$ -pinene. Exp. C-F are mixture groups containing both SO<sub>2</sub> and  $\alpha$ -pinene with different concentration ratio. [SO<sub>2</sub>] and [ $\alpha$ -pinene] represent the concentration of SO<sub>2</sub> and  $\alpha$ -pinene.**

| RH (%) | Group No. (Exp.) | Experiments                        | [SO <sub>2</sub> ] (ppbv) | [ $\alpha$ -pinene] (ppbv) | [ $\alpha$ -pinene]/[SO <sub>2</sub> ] |
|--------|------------------|------------------------------------|---------------------------|----------------------------|----------------------------------------|
| 20     | A                | SO <sub>2</sub>                    | ~503                      | 0                          | 0                                      |
|        | B                | $\alpha$ -pinene                   | 0                         | ~1960                      | $\infty$                               |
|        | C                | SO <sub>2</sub> / $\alpha$ -pinene | ~503                      | ~50                        | 0.1                                    |
|        | D                | SO <sub>2</sub> / $\alpha$ -pinene | ~503                      | ~99                        | 0.2                                    |
|        | E                | SO <sub>2</sub> / $\alpha$ -pinene | ~503                      | ~249                       | 0.5                                    |
|        | F                | SO <sub>2</sub> / $\alpha$ -pinene | ~503                      | ~497                       | 1                                      |
| 40     | A                | SO <sub>2</sub>                    | ~217                      | 0                          | 0                                      |
|        | B                | $\alpha$ -pinene                   | 0                         | ~1162                      | $\infty$                               |
|        | C                | SO <sub>2</sub> / $\alpha$ -pinene | ~217                      | ~22                        | 0.1                                    |
|        | D                | SO <sub>2</sub> / $\alpha$ -pinene | ~217                      | ~43                        | 0.2                                    |
|        | E                | SO <sub>2</sub> / $\alpha$ -pinene | ~217                      | ~109                       | 0.5                                    |
|        | F                | SO <sub>2</sub> / $\alpha$ -pinene | ~217                      | ~215                       | 1                                      |
| 60     | A                | SO <sub>2</sub>                    | ~169                      |                            | 0                                      |
|        | B                | $\alpha$ -pinene                   |                           | ~733                       | $\infty$                               |
|        | C                | SO <sub>2</sub> / $\alpha$ -pinene | ~169                      | ~17                        | 0.1                                    |
|        | D                | SO <sub>2</sub> / $\alpha$ -pinene | ~169                      | ~35                        | 0.2                                    |
|        | E                | SO <sub>2</sub> / $\alpha$ -pinene | ~169                      | ~85                        | 0.5                                    |
|        | F                | SO <sub>2</sub> / $\alpha$ -pinene | ~169                      | ~174                       | 1                                      |
| 80     | A                | SO <sub>2</sub>                    | ~96                       | 0                          | 0                                      |
|        | B                | $\alpha$ -pinene                   | 0                         | ~450                       | $\infty$                               |
|        | C                | SO <sub>2</sub> / $\alpha$ -pinene | ~96                       | ~10                        | 0.1                                    |
|        | D                | SO <sub>2</sub> / $\alpha$ -pinene | ~96                       | ~20                        | 0.2                                    |
|        | E                | SO <sub>2</sub> / $\alpha$ -pinene | ~96                       | ~48                        | 0.5                                    |
|        | F                | SO <sub>2</sub> / $\alpha$ -pinene | ~96                       | ~95                        | 1                                      |
